# Supplementary material
Source: PubMed Central journal article supplement (PMC3432478)
Supplement: NIHMS49774-supplement-01.pdf [file NIHMS49774-supplement-01.pdf]

# Social Psychiatry and Psychiatric Epidemiology

## COPYRIGHT TRANSFER STATEMENT

The copyright to this article is transferred to Steinkopff Verlag (for U.S. government employees: to the extent transferable) effective if and when the article is accepted for publication. The copyright transfer covers the exclusive right to reproduce and distribute the article, including reprints, translations, photographic reproductions, microform, electronic form (offline, online) or any other reproductions of similar nature.

An author may make an article published by Steinkopff Verlag available on a personal home page provided the source of the published article is cited and Steinkopff Verlag is mentioned a copyright holder. Authors are requested to create a link to the published article in SpringerLink, our internet service. The link must be accompanied by the following text: The original publication is available on SpringerLink as **www.springerlink.com**.

Please use the appropriate URL and/or DOI for the article in SpringerLink. Articles disseminated via SpringerLink are indexed, abstracted and referenced by many abstracting and information services, bibliographic networks, subscription agencies, library networks, and consortia.

The author warrants that this contribution is original and that he/she has full power to make this grant. The author signs for and accepts responsibility for releasing this material on behalf of any and all co-authors.

Poverty, Life events and their risk for depression  
in Uganda

Title of article

E. Kinyanda, P. Woodburn, J. Tugumisirize, J. Kagugaba  
Author(s) S. Adyambazigi, V. Patel.

Author(s)

Date

5/11/08

Signature of author (s)

To be completed by Steinkopff Verlag:

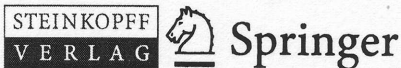

Published in Volume

Issue

Year
